# Supplementary material for: Representations of Free-Living and Unrestrained Dogs as an Emerging Public Health Issue in Australian Newspapers
Source: MDPI journal article supplement (doi:10.3390/ijerph18115807), 2021-05-28
Supplement: s1 [file s1]

**Figure S1. Search terms and PRISMA diagram**

"roaming dog" OR "stray dog" OR "feral dog " OR "wild dog " OR "camp dog" OR "community dog"

01/01/1990 to 31/12/2019. English Language, Region=Australia, Newspapers

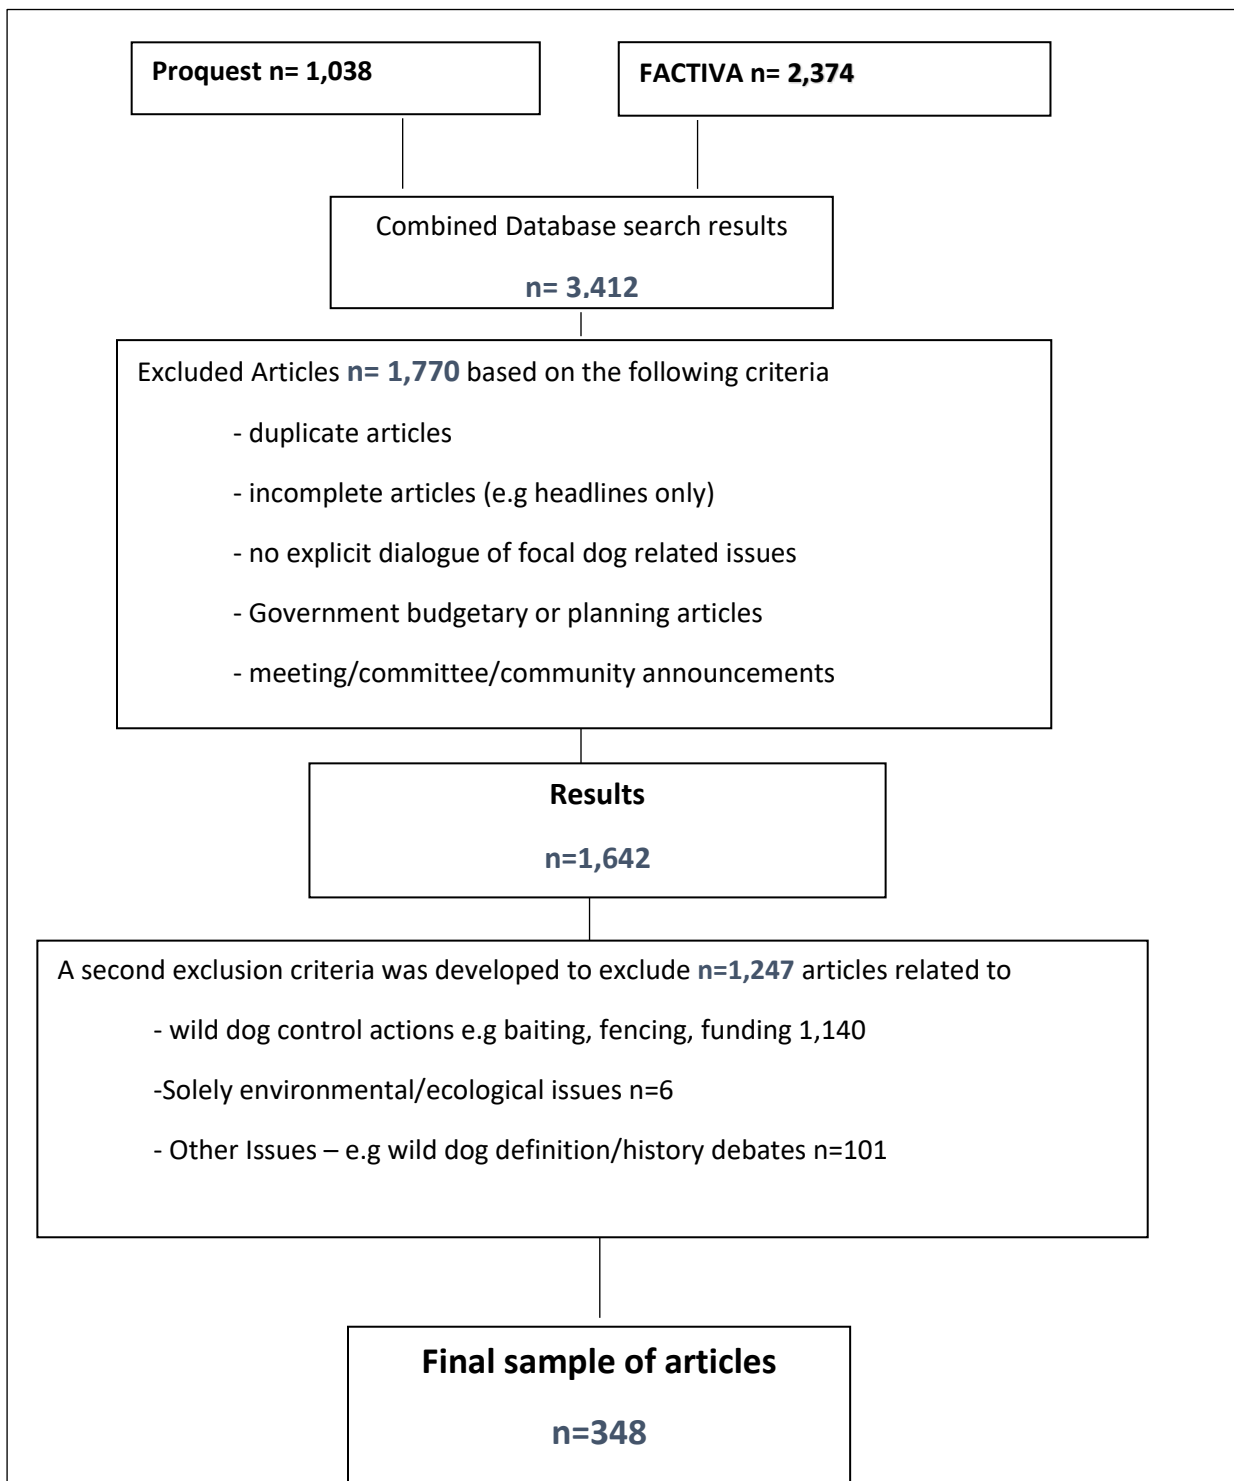

**Table S1:** Key features of reports of the public health impacts of free-living dogs in Australian newspapers

| Reported Public Health Impact                                        | Number of reports   | Most frequent media source                                                                                                                                                   | Category of dog most frequently implicated*                                                                                                                  | Most frequently reported setting                                                                                                          |
|----------------------------------------------------------------------|---------------------|------------------------------------------------------------------------------------------------------------------------------------------------------------------------------|--------------------------------------------------------------------------------------------------------------------------------------------------------------|-------------------------------------------------------------------------------------------------------------------------------------------|
| Attacks on humans by free-living dogs                                | 80 of 348 articles  | <ul style="list-style-type: none"> <li>38 reports in local/regional newspapers</li> <li>30 reports in provincial newspapers</li> <li>12 reports in national media</li> </ul> | <ul style="list-style-type: none"> <li>Wild dogs (45)</li> <li>Roaming/Stray dogs (14)</li> <li>Community/Camp dogs (6)</li> <li>Feral dogs (5)</li> </ul>   | Urban and peri-urban areas                                                                                                                |
| Emotional impacts of wild dog attacks on livestock and pet animals   | 203 of 348 articles | <ul style="list-style-type: none"> <li>123 reports in local/regional newspapers</li> <li>8 reports in provincial newspapers</li> <li>72 reports in national media</li> </ul> | <ul style="list-style-type: none"> <li>Wild dogs (179)</li> <li>Roaming/Stray dogs (28)</li> <li>Feral dog (15)</li> <li>Community/Camp dogs (3)</li> </ul>  | <ul style="list-style-type: none"> <li>Attacks on livestock in rural and remote areas.</li> <li>Attacks on pets in urban areas</li> </ul> |
| Unrestrained dogs threaten or scare humans                           | 128 of 348 articles | <ul style="list-style-type: none"> <li>77 reports in local/regional newspapers</li> <li>35 reports in provincial newspapers</li> <li>14 reports in national media</li> </ul> | <ul style="list-style-type: none"> <li>Wild dogs (100)</li> <li>Roaming/Stray dogs (17)</li> <li>Feral dogs (14)</li> <li>Community/Camp dogs (5)</li> </ul> | Occurs in all settings                                                                                                                    |
| Zoonotic risks to humans from free-living dogs                       | 21 of 348 articles  | <ul style="list-style-type: none"> <li>17 reports in local/regional newspapers</li> <li>2 reports in provincial newspapers</li> <li>2 reports in national media</li> </ul>   | <ul style="list-style-type: none"> <li>Wild dogs (18)</li> <li>Community/Camp dogs (5)</li> </ul>                                                            | Mainly peri-urban areas; some in First Nations' communities                                                                               |
| Public health impacts on Aboriginal and Torres Strait Island peoples | 23 of 348 articles  | <ul style="list-style-type: none"> <li>12 reports in local/regional newspapers</li> <li>5 reports in provincial newspapers</li> <li>7 reports in national media</li> </ul>   | <ul style="list-style-type: none"> <li>Community/camp dogs (23)</li> </ul>                                                                                   | First Nations' communities                                                                                                                |

\* An article can mention more than one type of dog
